# Supplementary material for: Reduced nitric oxide levels during drought stress promote drought tolerance in barley and is associated with elevated polyamine biosynthesis
Source: PubMed Central journal article supplement (PMC5645388; doi:10.1038/s41598-017-13458-1), 2017-10-17
Supplement: 41598_2017_13458_MOESM1_ESM.pdf [file 41598_2017_13458_MOESM1_ESM.pdf]

## Supplementary Information

**Reduced nitric oxide levels during drought stress promote drought tolerance in barley and is associated with elevated polyamine biosynthesis.**

**Gracia Montilla-Bascón<sup>1</sup>, Diego Rubiales<sup>1</sup>, Kim H Hebelstrup<sup>2</sup>, Julien Mandon<sup>3</sup>, Frans J.M. Harren<sup>3</sup>, Simona M. Cristescu<sup>3</sup>, Luis AJ Mur<sup>4</sup>, and Elena Prats<sup>1\*</sup>**

<sup>1</sup>CSIC, Institute for Sustainable Agriculture, Córdoba, Spain.

<sup>2</sup>Section of Crop Genetics and Biotechnology, Department of Molecular Biology and Genetics Aarhus University, Slagelse, Denmark

<sup>3</sup>Radboud University, Department of Molecular and Laser Physics. Nijmegen, the Netherlands

<sup>4</sup>Institute of Biological, Environmental and Rural Sciences, University of Aberystwyth, UK

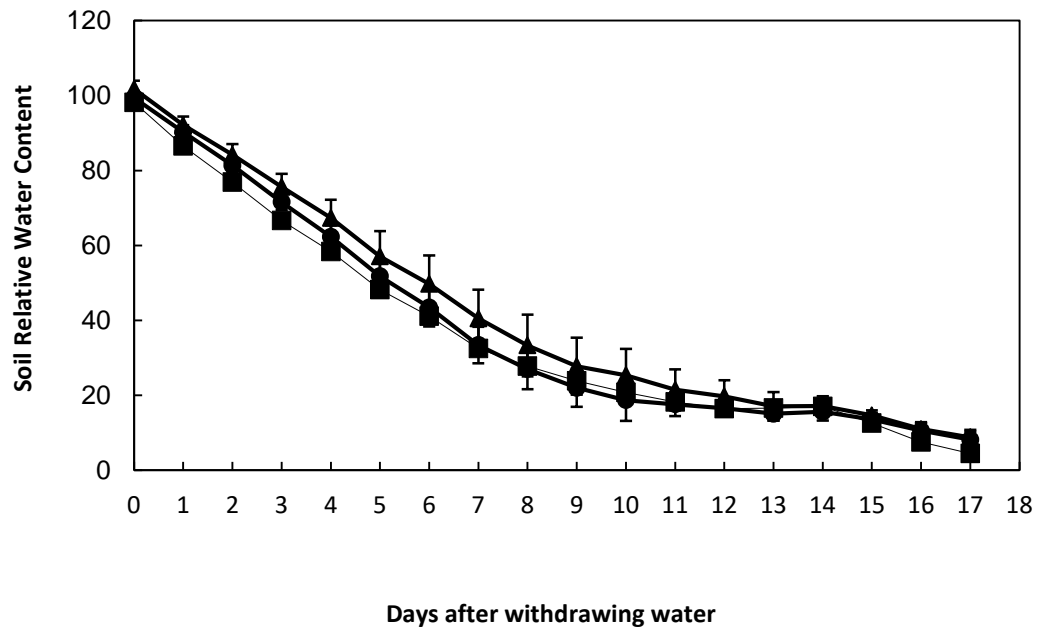

**Supplementary Figure 1 .** Soil relative water content in WT (circles) and transgenic UHb-05 (triangles) and UHb-06 (squares) plants during a time course of drought. Data are mean of two independent experiments, each with ten replicates per genotypes. Bars indicates standars errors.

**Supplementary Table 1.** Pearson correlations between total polyamines (PA) and their most direct amino acids precursors (Arginine, ARG; Citrulline, CIT; Methionine, MET; Ornithine, ORN) and PA derivatives (γ-aminobutyric acid, GABA; and 1,3-diaminopropane, DAP) in barley WT and UHb plants. \*, \*\*, and \*\*\* indicate significant differences at  $P < 0,05$ ; 0,01 and 0,001 respectively

| WT              |            |            |            |             |            |            |                 |
|-----------------|------------|------------|------------|-------------|------------|------------|-----------------|
| <b>ARG</b>      |            |            |            |             |            |            |                 |
| <b>CIT</b>      | 0.0623     |            |            |             |            |            |                 |
| <b>DAP</b>      | 0.3337     | -0.7226*   |            |             |            |            |                 |
| <b>GABA</b>     | -0.5382    | -0.7055    | 0.3477     |             |            |            |                 |
| <b>MET</b>      | 0.1666     | -0.2348    | 0.3625     | -0.2059     |            |            |                 |
| <b>ORN</b>      | -0.4259    | -0.8659**  | 0.4871     | 0.8505**    | 0.0917     |            |                 |
| <b>Total PA</b> | 0.1160     | -0.8352**  | 0.7566*    | 0.6271      | 0.4031     | 0.7241*    |                 |
| UHb             |            |            |            |             |            |            |                 |
| <b>ARG</b>      |            |            |            |             |            |            |                 |
| <b>CIT</b>      | -0.8311*   |            |            |             |            |            |                 |
| <b>DAP</b>      | 0.8441**   | -0.6661    |            |             |            |            |                 |
| <b>GABA</b>     | -0.8567**  | 0.6939     | -0.7774*   |             |            |            |                 |
| <b>MET</b>      | 0.6942     | -0.5999    | 0.8253*    | -0.8705**   |            |            |                 |
| <b>ORN</b>      | 0.8117*    | -0.6358    | 0.8997**   | -0.8191*    | 0.8854**   |            |                 |
| <b>Total PA</b> | 0.8209*    | -0.5433    | 0.9711***  | -0.8056*    | 0.8137*    | 0.8926**   |                 |
|                 | <b>ARG</b> | <b>CIT</b> | <b>DAP</b> | <b>GABA</b> | <b>MET</b> | <b>ORN</b> | <b>Total PA</b> |
